# Supplementary material
Source: HighWire-hosted journal article supplement (https://www.highwirestage.com/highwire/filestream/105285/field_highwire_adjunct_files/0/0691.pdf)
Supplement: 0691.pdf [file 0691.pdf]

## Supplemental material

**Supplemental table 1.** Quality Assessment of Diagnostic Accuracy Studies (QUADAS-2) results

| Study                                                                                                                                                                                                                                                                                       | RISK OF BIAS                                                                        |                                                                                     |                                                                                     |                                                                                     | APPLICABILITY CONCERNS                                                                |                                                                                       |                                                                                       |
|---------------------------------------------------------------------------------------------------------------------------------------------------------------------------------------------------------------------------------------------------------------------------------------------|-------------------------------------------------------------------------------------|-------------------------------------------------------------------------------------|-------------------------------------------------------------------------------------|-------------------------------------------------------------------------------------|---------------------------------------------------------------------------------------|---------------------------------------------------------------------------------------|---------------------------------------------------------------------------------------|
|                                                                                                                                                                                                                                                                                             | PATIENT<br>SELECTION                                                                | INDEX<br>TEST                                                                       | REFERE<br>NCE<br>STANDA<br>RD                                                       | FLO<br>W<br>AND<br>TIMI<br>NG                                                       | PATIENT<br>SELECTION                                                                  | INDEX<br>TEST                                                                         | REFERE<br>NCE<br>STANDA<br>RD                                                         |
| Bathla et al.<br>2022                                                                                                                                                                                                                                                                       |    |    |    |    |    |    |    |
| Byrne et al.<br>2017                                                                                                                                                                                                                                                                        |    |    |    |    |    |    |    |
| Duvekot et al.<br>2021                                                                                                                                                                                                                                                                      |    |    |    |    |    |    |    |
| Fasen et al.<br>2020                                                                                                                                                                                                                                                                        |    |    |    |    |    |    |    |
| Amukotuwa et<br>al 2021                                                                                                                                                                                                                                                                     |    |    |    |    |    |    |    |
| Olive-Gadea et<br>al. 2021                                                                                                                                                                                                                                                                  |    |    |    |    |    |    |    |
| Ospel et al.<br>2021                                                                                                                                                                                                                                                                        |    |    |    |    |    |    |    |
| Volny et al.<br>2016                                                                                                                                                                                                                                                                        |  |  |  |  |  |  |  |
| Smit et al. 2015                                                                                                                                                                                                                                                                            |  |  |  |  |  |  |  |
| Fasen et al.<br>2021                                                                                                                                                                                                                                                                        |  |  |  |  |  |  |  |
| Becks et al.<br>2019                                                                                                                                                                                                                                                                        |  |  |  |  |  |  |  |
| McDonough et<br>al. 2022                                                                                                                                                                                                                                                                    |  |  |  |  |  |  |  |
|  Low Risk  High Risk  Unclear Risk |                                                                                     |                                                                                     |                                                                                     |                                                                                     |                                                                                       |                                                                                       |                                                                                       |

**Supplemental table 2.** Grading of Recommendations, Assessment, Development and Evaluation (GRADE) evaluation

|     | Test result                                                                    | Studies | Study design                | Factors that may decrease quality of evidence                                                  |                 |                                                       |                        |                                                                    | Final Quality |
|-----|--------------------------------------------------------------------------------|---------|-----------------------------|------------------------------------------------------------------------------------------------|-----------------|-------------------------------------------------------|------------------------|--------------------------------------------------------------------|---------------|
|     |                                                                                |         |                             | Risk of bias                                                                                   | Publishing bias | Inconsistency                                         | Imprecision            | Indirectness of test accuracy                                      |               |
| CTA | Pooled sensitivity = 0.74 (0.63-0.82)<br>Pooled specificity = 0.97 (0.93-0.99) | 12      | 6 cohort and 6 case-control | Downgraded by 2 levels due to case-control design of 7 studies and the reference standard used | Not detected    | No serious inconsistency or unexplained heterogeneity | No serious imprecision | Downgraded by 1 level due to between-study comparison in 8 studies | Low ++/       |
| CTP | Pooled sensitivity = 0.89 (0.83-0.93)<br>Pooled specificity = 0.96 (0.86-0.99) | 4       | 3 cohort and 1 case-control |                                                                                                |                 |                                                       |                        |                                                                    |               |

**Supplemental table 3.** Comparison of accuracy tests in the studies presenting both techniques.

| Study                  | R            | Sensitivity, Value %<br>(95%CI) |                                | Specificity, Value %<br>(95%CI) |                               | Diagnostic accuracy for DMVO detection<br>CTA vs. CTP/CTP+CTA                                                        |
|------------------------|--------------|---------------------------------|--------------------------------|---------------------------------|-------------------------------|----------------------------------------------------------------------------------------------------------------------|
|                        |              | CTA                             | CTP/CTA+CTP <sup>1</sup>       | CTA                             | CTP/CTA+CTP <sup>1</sup>      |                                                                                                                      |
| Amokuto wa et al. 2021 | 1            | 60 (47.6-71.5)                  | 95.7 (88.0-99.1) <sup>2</sup>  | 78.6 (67.1-87.5)                | 88.6 (78.7-94.9) <sup>2</sup> | Diagnostic accuracy measured by AUC was better on CTP alone (p<0.001)                                                |
|                        | 2            | 77.1 (65.6-86.3)                | 98.6 (92.3-100.0) <sup>2</sup> | 90.0 (80.5-95.9)                | 91.4 (82.3-96.8) <sup>2</sup> |                                                                                                                      |
|                        | 3            | 71.4 (59.4-81.6)                | 95.7 (88.0-99.1) <sup>2</sup>  | 95.7 (88.0-99.1)                | 97.1 (90.1-99.7) <sup>2</sup> |                                                                                                                      |
|                        | 4            | 74.3 (62.4-84.0)                | 97.1 (90.1-99.7) <sup>2</sup>  | 85.7 (75.3-92.9)                | 84.3 (73.6-91.9) <sup>2</sup> |                                                                                                                      |
|                        | <b>TOTAL</b> | <b>70.7 (na)</b>                | <b>96.8 (na)<sup>2</sup></b>   | <b>87.5 (na)<sup>2</sup></b>    | <b>90.3 (na)<sup>2</sup></b>  |                                                                                                                      |
| Bathla et al. 2022     | 1            | 76 (61.23-87.41)                | 93 (82.10-99.54)               | 96 (87.02-99.54)                | 96 (84.64-98.82)              | Diagnostic accuracy improved with the addition of CTP maps for both readers (p=0.001 and p=0.004 using McNemar test) |
|                        | 2            | 78 (63.64-89.05)                | 91 (79.21-97.58)               | 91 (79.34-96.87)                | 98 (89.93-99.95)              |                                                                                                                      |
|                        | <b>TOTAL</b> | <b>0.77 (na)</b>                | <b>0.92 (na)</b>               | <b>0.935 (na)</b>               | <b>0.97 (na)</b>              |                                                                                                                      |
| Becks et al. 2022      | 1            | 33 (na)                         | 67 (na)                        | 100 (na)                        | 99 (na)                       | The addition of CTP increased the accuracy of DMVO detection with an AUC increase on CTP+CTA vs CTA alone (p=0.032)  |
|                        | 2            | 75 (na)                         | 88 (na)                        | 94 (na)                         | 93 (na)                       |                                                                                                                      |
|                        | 3            | 63 (na)                         | 96 (na)                        | 95 (na)                         | 95 (na)                       |                                                                                                                      |
|                        | <b>TOTAL</b> | <b>57 (na)</b>                  | <b>83 (na)</b>                 | <b>97 (na)</b>                  | <b>96 (na)</b>                |                                                                                                                      |

R=reader; CTA= computed tomography angiography; CTP=computed tomography perfusion; ns=non-significant; na=not available. <sup>1</sup>CTP values are CTA+CTP unless otherwise specified; <sup>2</sup>CTP values are derived from CTP Tmax alone without CTA; <sup>3</sup>Data separated by individual readers are not available.

**Supplemental table 4.** Comparison of accuracy tests in the studies presenting spCTA and mpCTA.

| Study                    | Sensitivity, Value % (95%CI) |                  |                 | Specificity, Value % (95%CI) |                 | Conclusions                                                                                                                              |
|--------------------------|------------------------------|------------------|-----------------|------------------------------|-----------------|------------------------------------------------------------------------------------------------------------------------------------------|
|                          |                              | Single-phase CTA | Multi-phase CTA | Single-phase CTA             | Multi-phase CTA |                                                                                                                                          |
| <b>Byrne et al. 2017</b> | Trainees                     | 71.7 (57.4–82.7) | 100 (92.2–100)  |                              |                 | Significant improvement in the sensitivity of DMVOs in MPCTA compared with SPCTA (P<0.001)                                               |
|                          | Neuroradiologist             | 78.3 (64.4–87.7) | 100 (92.2–100)  |                              |                 |                                                                                                                                          |
| <b>Ospel et al. 2022</b> | N/A                          |                  | N/A             | N/A                          | N/A             | The accuracy of MeVO detection for all 3 readers ranged between 57% and 61% on single-phase CTA and improved to 86%–89% with mCTA.       |
| <b>Volny et al. 2016</b> |                              | 0.86 (.81–0.90)  | 0.86 (.81–0.91) | 0.75 (.65–0.83)              | 0.82 (.73–0.89) | The sensitivity and specificity of both methods for primary clot detection were comparable as they had overlapping confidence intervals. |

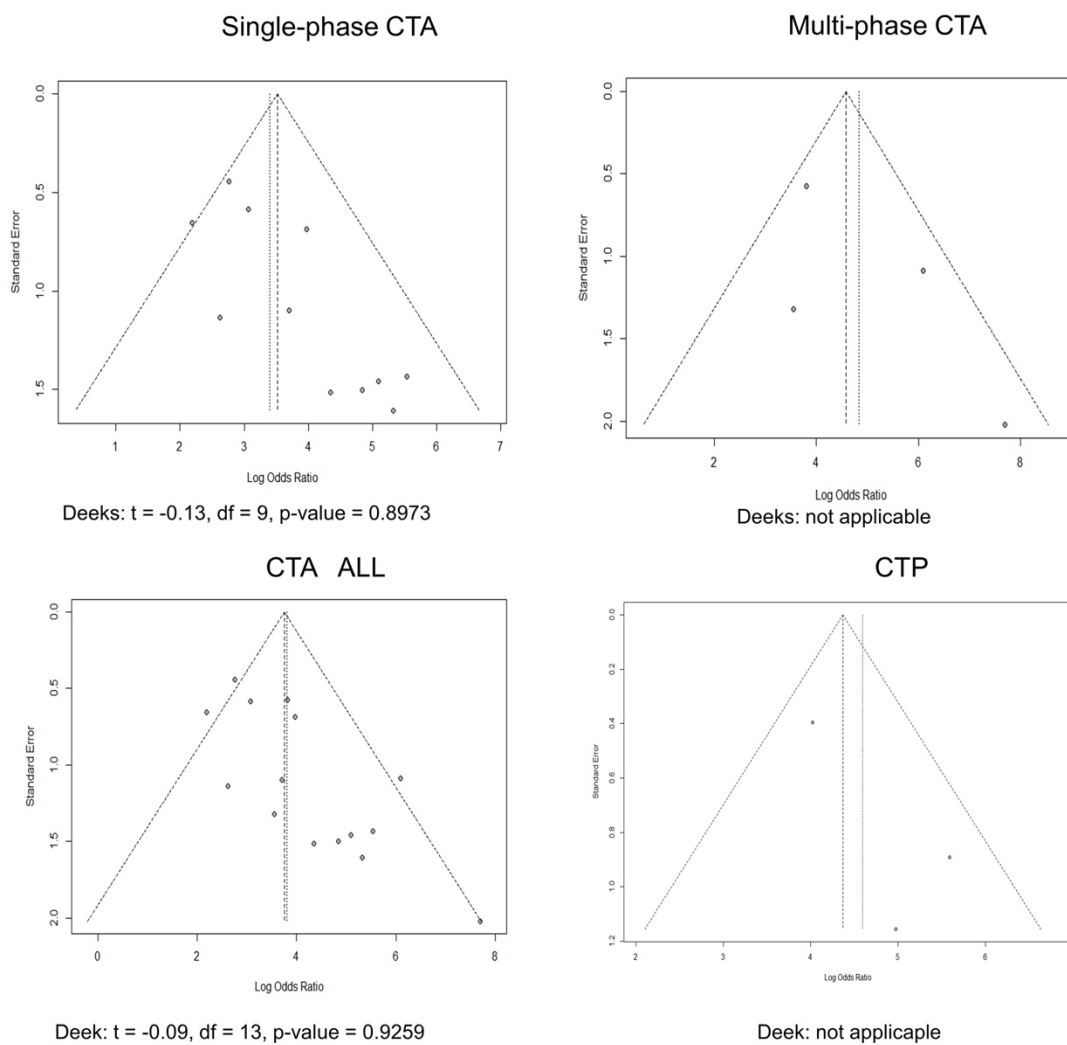

### Supplemental figure 1.

Funnel plot and complementary Deek's test of studies reporting on computed tomography angiography (CTA) including single and multi-phase, and computed tomography perfusion (CTP).

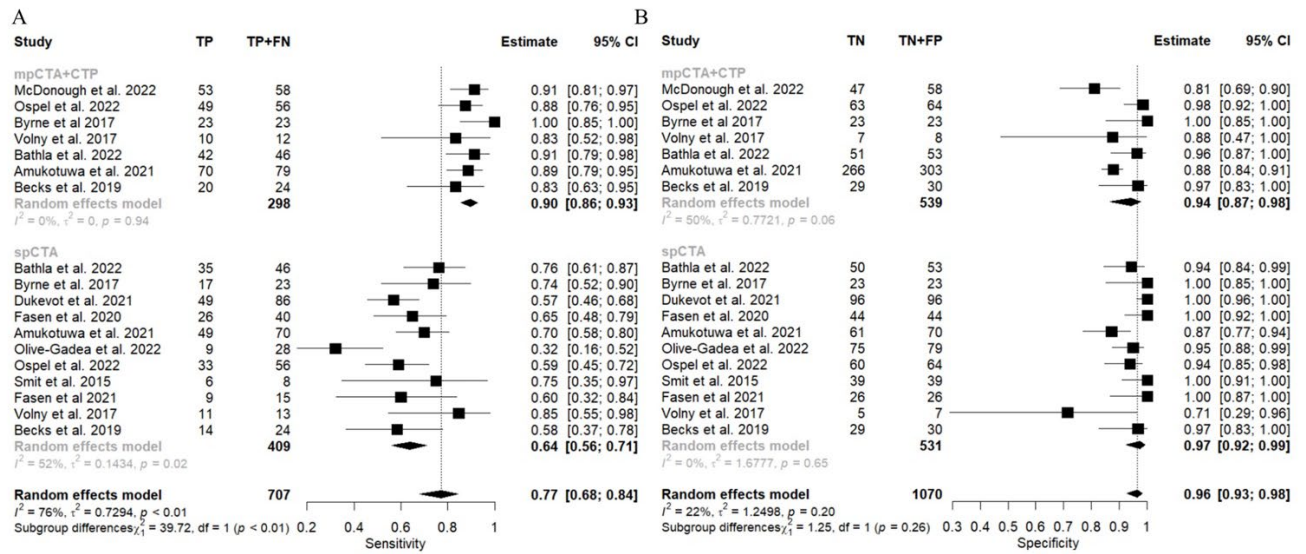

## Supplemental figure 2.

Pooled analysis of multi-phase computed tomography angiography (mpCTA) and computed tomography perfusion studies compared with single-phase computed tomography angiography (spCTA) studies.
